# Supplementary material for: Combination of starvation therapy and Pt-NP based chemotherapy for synergistic cancer treatment
Source: Royal Society of Chemistry journal article supplement (doi:10.1039/d1tb01222c), 2021-01-01
Supplement: d1tb01222c1.pdf [file d1tb01222c1.pdf]

## **Combination of Starvation Therapy and Pt-NPs based Chemotherapy for Synergistic Cancer Treatment**

Jie Yu,<sup>ab</sup> Xidong He,<sup>b</sup> Zigui Wang,<sup>b</sup> Sha Liu,<sup>b</sup> Dengyuan Hao,<sup>b</sup> Xiaoyuan Li<sup>\*a</sup> and Yubin Huang<sup>\*a</sup>

<sup>a</sup>Faculty of Chemistry, Northeast Normal University, Changchun 130024, P.R. China

<sup>b</sup>State Key Laboratory of Polymer Physics and Chemistry, Changchun Institute of Applied Chemistry, Chinese Academy of Sciences, Changchun 130022, P. R. China

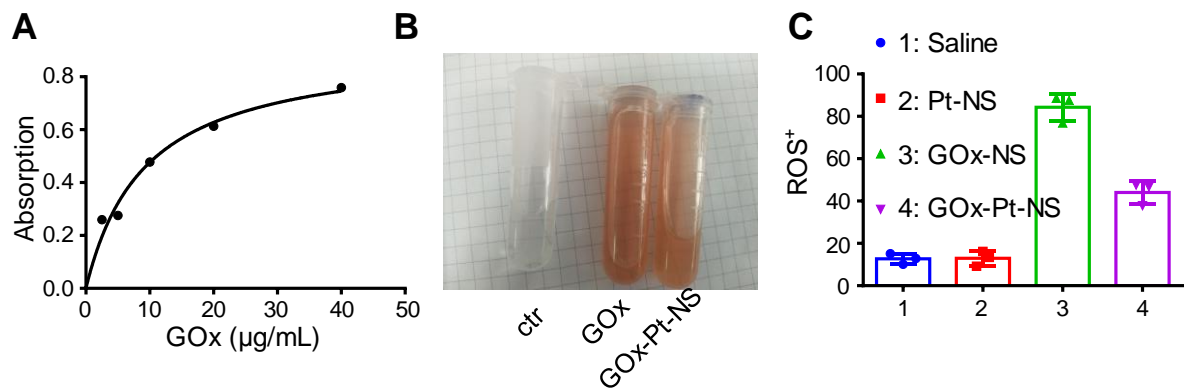

**Fig. S1.** A) The catalytic activity of standard GOx. B) The catalytic activity of GOx before and after the formation of nanoparticles. C) ROS generation in cells treated with Pt-NS, GOx-NS and GOx-Pt-NS calculated by FACS.

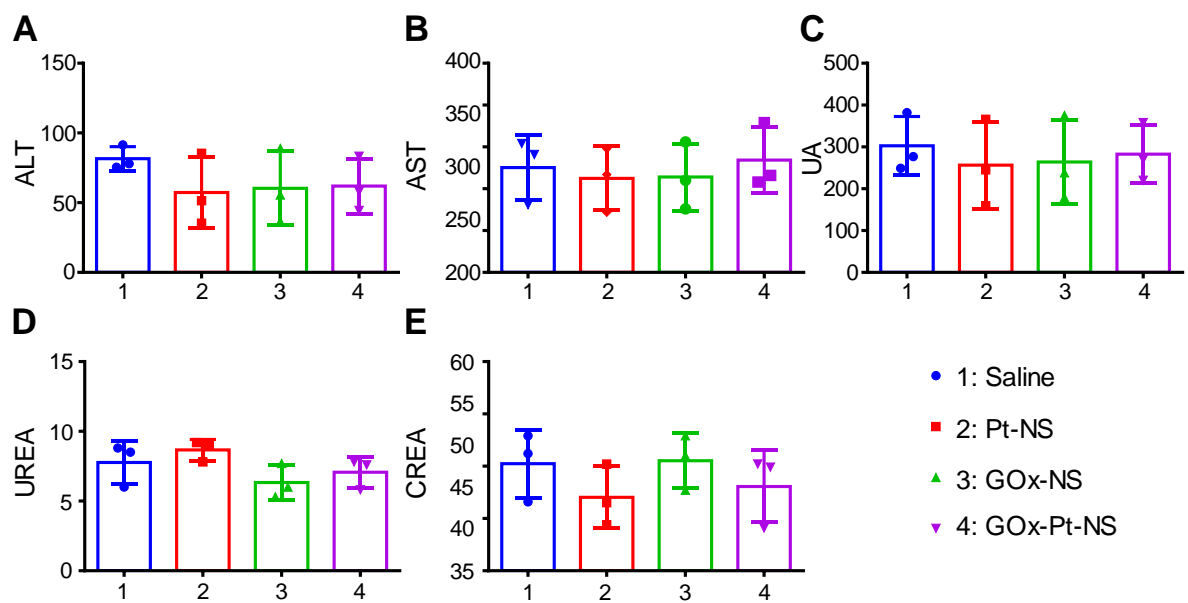

**Fig. S2.** Alterations of ALT, AST, CREA, UA and UREA of BALB/c mice bearing CT26 model after treated with Pt-NS, GOx-NS and GOx-Pt-NS.

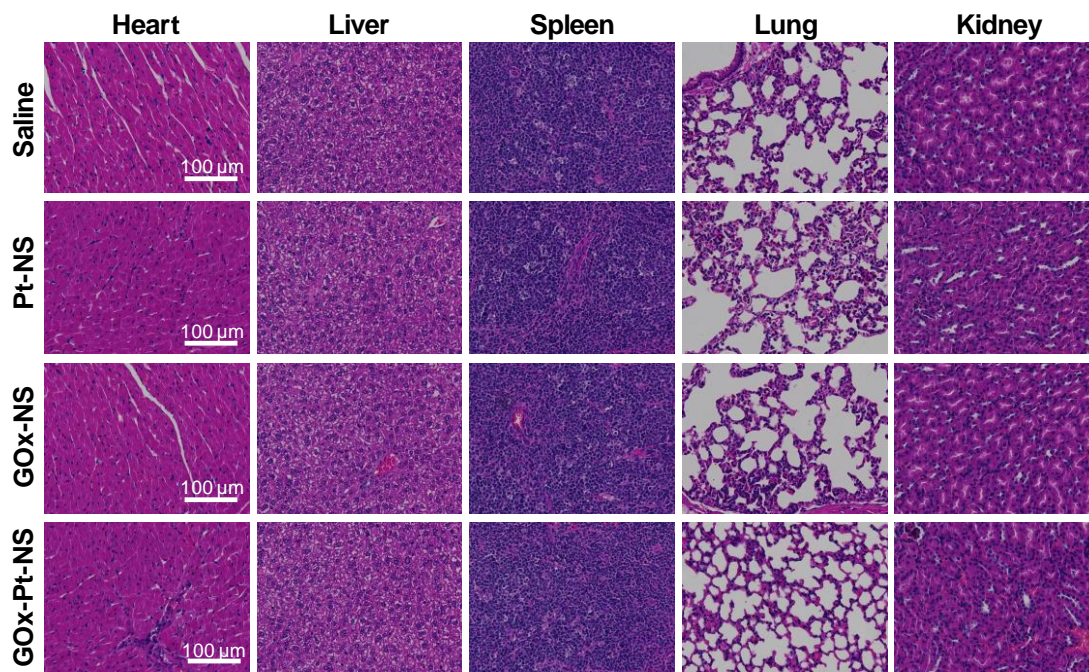

Fig. S3. Histological analysis of tissues with H&E after treated with Pt-NS, GOx-NS and GOx-Pt-NS.
